# Supplementary material for: Combinatorial Virtual Library Screening Study of Transforming Growth Factor-β2–Chondroitin Sulfate System
Source: MDPI journal article supplement (doi:10.3390/ijms22147542), 2021-07-14
Supplement: s1 [file s1]

## SUPPLEMENTARY INFORMATION

### Combinatorial Virtual Library Screening Study of Transforming Growth Factor Beta-2 – Chondroitin Sulfate System

Nehru Viji Sankaranarayanan<sup>1,2#</sup>, Balaji Nagarajan,<sup>1,2#</sup> and Umesh R. Desai<sup>1,2\*</sup>

<sup>1</sup>*Institute for Structural Biology, Drug Discovery and Development and* <sup>2</sup>*Department of Medicinal Chemistry, Virginia Commonwealth University, Richmond, VA 23298, USA*

*#Equal contributing authors*

*\*Addresses for correspondence: Umesh R Desai (urdesai@vcu.edu), 800 E. Leigh Street, Suite 212, Richmond, VA 23219. Ph (804) 828-7575; Fax (804) 827-3664*

#### Table of Contents

| # | Item                                                                                                                  | Pg. # |
|---|-----------------------------------------------------------------------------------------------------------------------|-------|
| 1 | <b>Figure S1.</b> Sequence of TGF- $\beta$ 2 – to identify GAG binding sequence motif                                 | S2    |
| 2 | <b>Figure S2.</b> Conformational space exploration of TGF- $\beta$ 2-CS06 complex in binding site1 (BS1)              | S3    |
| 3 | <b>Figure S3.</b> Conformational space exploration of TGF- $\beta$ 2-CS06 complex in BS1                              | S4    |
| 4 | <b>Figure S4.</b> Conformational space exploration of TGF- $\beta$ 2-CS06 complex in binding site 2 (BS2)             | S5    |
| 5 | <b>Figure S5.</b> Conformational space exploration of TGF- $\beta$ 2-CS06 complex in BS2                              | S6    |
| 6 | <b>Figure S6.</b> Conformational sampling of two CS06 sequences simultaneously bound in BS1 and BS2 of TGF- $\beta$ 2 | S7    |
| 7 | <b>Figure S7.</b> Conformational sampling of two CS06 sequences simultaneously bound in BS1 and BS2 of TGF- $\beta$ 2 | S8    |

|                        |                        |                        |                        |                        |  |
|------------------------|------------------------|------------------------|------------------------|------------------------|--|
| 10                     | 20                     | 30                     | 40                     | 50                     |  |
| MHYCVLSAFL             | ILHLVTVALS             | LSTCSTLDMD             | QFMRKRIEAI             | RGQILSKLKL             |  |
| 60                     | 70                     | 80                     | 90                     | 100                    |  |
| TSPPEDYPEP             | EEVPPEVISI             | YNSTRDLLQE             | KASRRAAACE             | RESDDEEYYA             |  |
| 110                    | 120                    | 130                    | 140                    | 150                    |  |
| KEVYKIDMPP             | FFPSENAIPP             | TFYRPYFRIV             | RFDVSAMEKN             | ASNLVKAEFR             |  |
| 160                    | 170                    | 180                    | 190                    | 200                    |  |
| VFRLQNP <del>KAR</del> | VPEQRIELYQ             | ILKSKDLTSP             | TQRYIDS <del>KVV</del> | KTRAEGEWLS             |  |
| 210                    | 220                    | 230                    | 240                    | 250                    |  |
| FDVTD <del>AVHEW</del> | LHHKDRNLGF             | KISLHCPCT              | FVPSNNYIIP             | NKSEELEARF             |  |
| 260                    | 270                    | 280                    | 290                    | 300                    |  |
| AGIDGTSTYT             | SGDQ <del>KTIKST</del> | RKKNSG <del>KTPH</del> | LLLMLLPSYR             | LESQQTN <del>RRK</del> |  |
| 310                    | 320                    | 330                    | 340                    | 350                    |  |
| <del>KRALDAAYCF</del>  | <del>RNVQDNCCLR</del>  | <del>PLYIDFKRDL</del>  | <del>GWKWIHEPKG</del>  | <del>YNANFCAGAC</del>  |  |
| 360                    | 370                    | 380                    | 390                    | 400                    |  |
| <del>PYLWSSDTQH</del>  | <del>SRVLSLYNTI</del>  | <del>NPEASASPCC</del>  | <del>VSQDLEPLTI</del>  | <del>LYYIGKTPKI</del>  |  |
| 410                    |                        |                        |                        |                        |  |
| <del>EQLSNMIVKS</del>  | <del>CKCS</del>        |                        |                        |                        |  |

TGF-β2

**Figure S1.** The sequence of TGF-β2 extracted from Uniprot ID: P61812. The region of TGF-β2 is shown in gray. The mapping of potential GAG binding was done by considering the presence of Cardin and Weintraub consensus sequence motif ([–XBBXB–] and [–XBBBXXB–]; B = basic residue and X = hydrophobic residue.). The sequence region belonging to TGF-β2 did not show any consensus sequence pattern. See Methods for details.

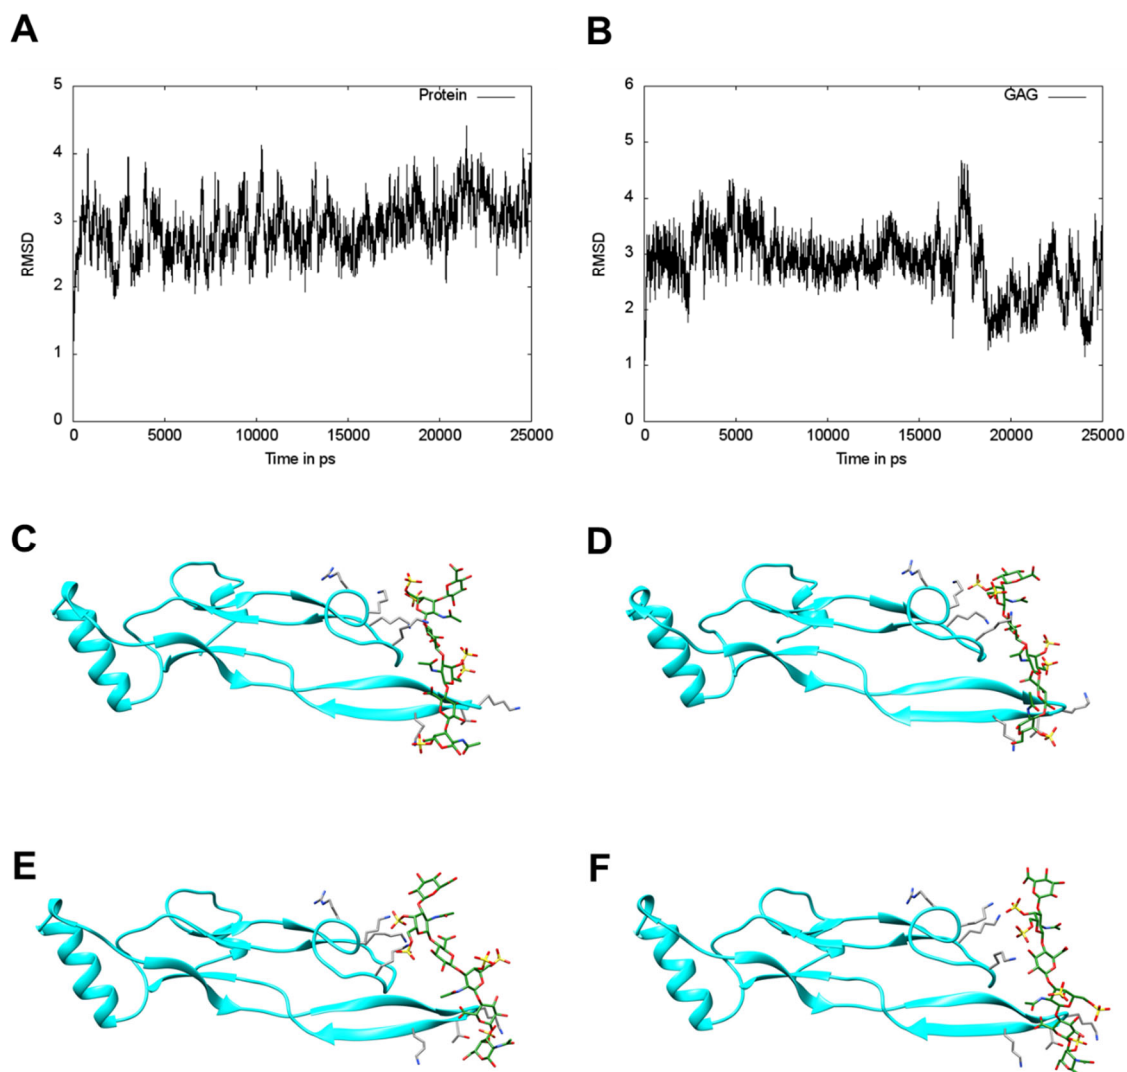

**Figure S2.** Conformational sampling of CS06 bound in BS1 of TGF-β2 from MD simulation to give an overall picture on the movement of protein (A) and ligand (B) was in presence of solvent (see **Movie SM1**). (C) through (F) show representative frames of the MD simulation showing the bound hexasaccharide (in green sticks) and the interacting residues (shown as sticks). See Methods for details.

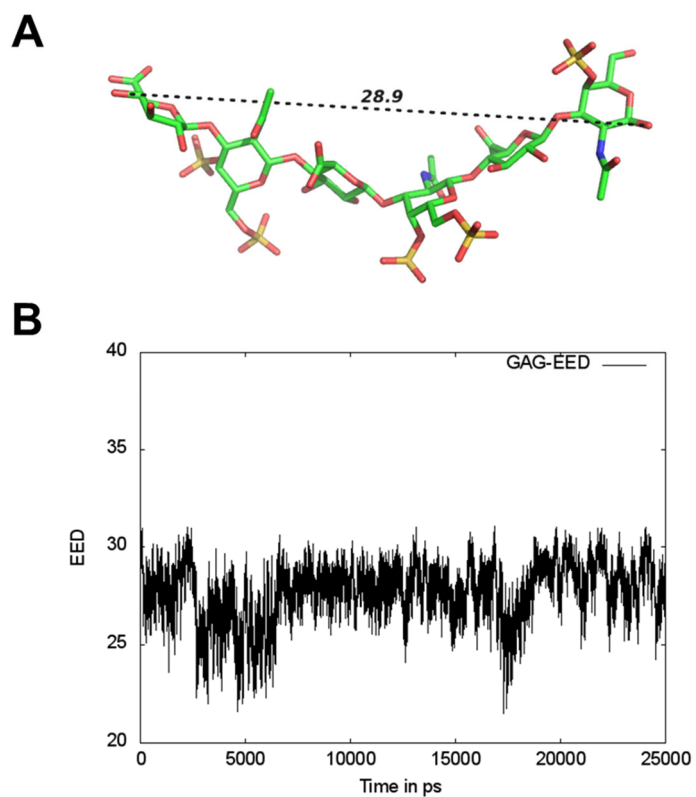

**Figure S3.** Conformational space exploration of TGF- $\beta$ 2-CS06 complex in BS1. A) A representative structure showing the end-to-end distance (EED) of the CS06. B) Time-based fluctuation of the EED during the MD simulation for the bound CS06.

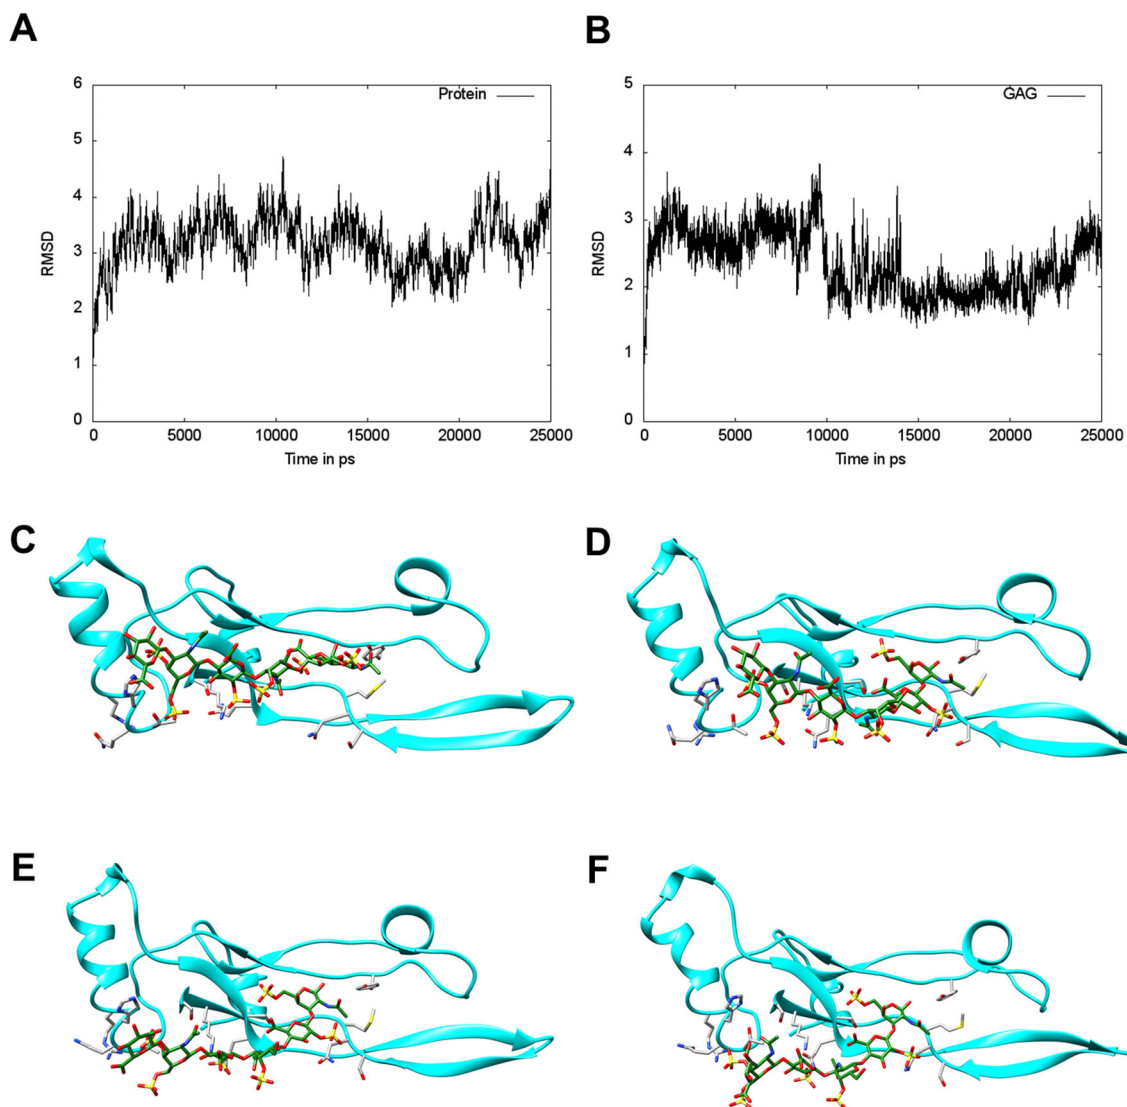

**Figure S4.** Conformational sampling of CS06 bound in BS2 of TGF-β2 from MD simulation to give an overall picture on the movement of protein (A) and ligand (B) was in presence of solvent (see **Movie SM2**). (C) through (F) show representative frames of the MD simulation showing the bound hexasaccharide (in green sticks) and the interacting residues (shown as sticks). See Methods for details.

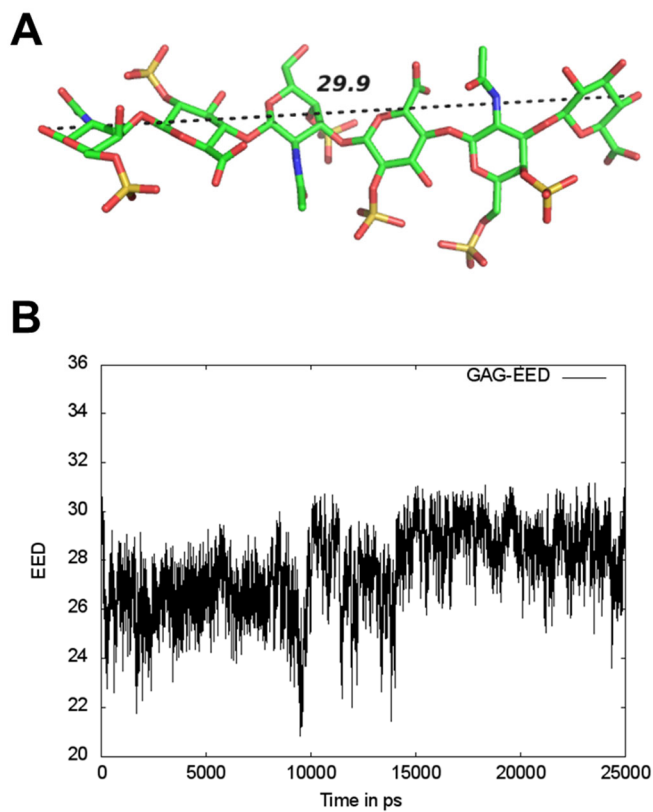

**Figure S5.** Conformational space exploration of TGF- $\beta$ 2-CS06 complex in BS2. A) A representative structure showing the end-to-end distance (EED) of the CS06. B) Time based fluctuation of the EED during the MD simulation for the bound CS06.

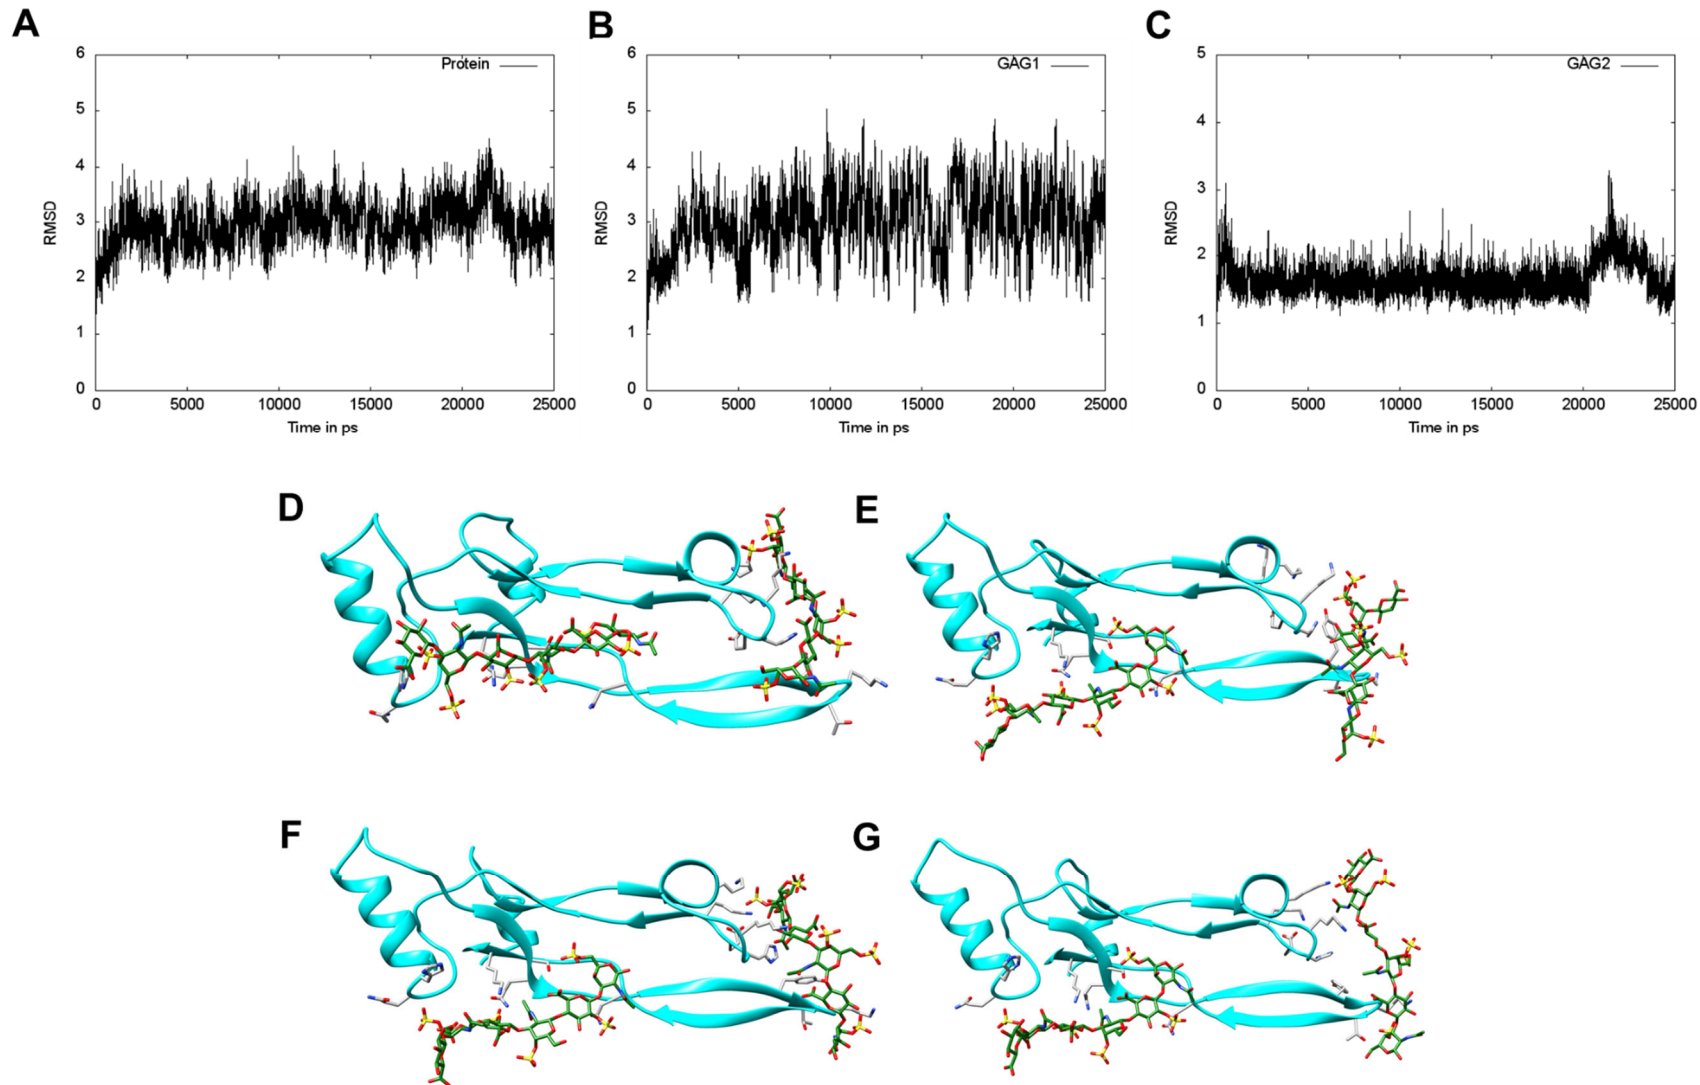

**Figure S6.** Conformational sampling of two CS06 sequences simultaneously bound in BS1 and BS2 of TGF-β2 from MD simulation to give an overall picture on the movement of protein (A) and ligand (B) was in presence of solvent (see **Movie SM3**). (C) through (F) show representative frames of the MD simulation showing the bound hexasaccharides (in green sticks) and the interacting residues (shown as sticks). See Methods for details.

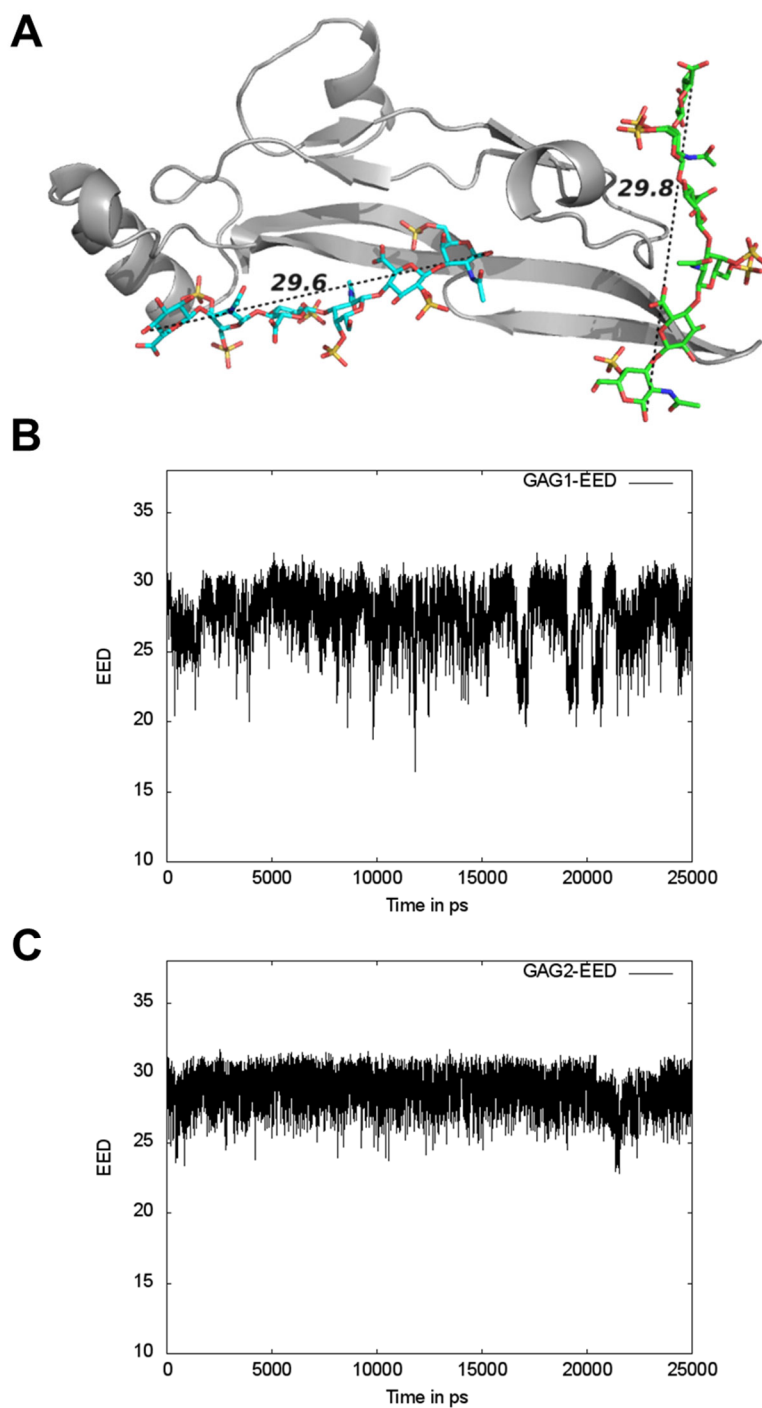

**Figure S7.** Conformational sampling of two CS06 sequences simultaneously bound in BS1 and BS2 of TGF- $\beta$ 2. A) A representative structure showing the end-to-end distance (EED) of the CS06. B) Time based fluctuation of the EED during the MD simulation for the bound CS06.
