# Supplementary material for: Combinatorial Virtual Library Screening Study of Transforming Growth Factor-β2–Chondroitin Sulfate System
Source: Int J Mol Sci. 2021 Jul 14;22(14):7542. doi: 10.3390/ijms22147542 (PMC8305211; doi:10.3390/ijms22147542)
Supplement: Supplementary file 1 [file ijms-22-07542-s001.zip]

Archive with 4 entries (4 files):
- SupplMovie SM1.pptx
- SupplMovie SM2.pptx
- SupplMovie SM3.pptx
- TGFb_SI_7Jun2021.pdf
